# Supplementary material for: Co-Responses of Soil Organic Carbon Pool and Biogeochemistry to Different Long-Term Fertilization Practices in Paddy Fields
Source: MDPI journal article supplement (doi:10.3390/plants11233195), 2022-11-22
Supplement: s1 [file s1]

## Supplementary Materials

**Table S1.** Properties of soil organic amendments applied to paddy fields.

| Type | N              | P    | K    | C  |
|------|----------------|------|------|----|
|      | ----- (%)----- |      |      |    |
| CM   | 0.40           | 0.24 | 0.07 | 23 |
| OCM  | 4.5            | 0.65 | 0.83 | 41 |
| RS   | 0.72           | 0.14 | 1.4  | 48 |
| WS   | 0.70           | 0.14 | 1.2  | 50 |
| MC   | 9.0            | 0.44 | 1.7  | 35 |

CM, cow manure; OCM, Oilseed cake manure; RS, rice straw; WS, wheat straw; MC, manure compost

**Table S2.** Loadings of variables evaluated through PCA in this study.

| Soil parameter                    | PC1    | PC2    |
|-----------------------------------|--------|--------|
| LOIC                              | 0.771  | 0.370  |
| WBC                               | 0.651  | 0.601  |
| POXC                              | 0.553  | 0.696  |
| MBC                               | 0.630  | 0.544  |
| EC                                | -0.645 | 0.104  |
| T-N                               | 0.563  | 0.640  |
| NH <sub>4</sub>                   | 0.688  | 0.225  |
| NO <sub>3</sub>                   | 0.415  | -0.269 |
| Av. P <sub>2</sub> O <sub>5</sub> | -0.281 | 0.651  |
| CEC                               | 0.856  | -0.242 |
| Ca                                | 0.923  | 0.035  |
| Mg                                | 0.924  | -0.244 |
| Clay                              | 0.437  | -0.609 |
| Sand                              | -0.757 | 0.616  |
| Silt                              | 0.756  | -0.581 |
| CH <sub>4</sub>                   | 0.579  | 0.273  |
| N <sub>2</sub> O                  | 0.622  | -0.232 |

LOIC, loss-on-ignition carbon; WBC, Walkley-Black carbon; POXC, permanganate oxidizable carbon; MBC, microbial biomass carbon; EC, electrical conductivity; T-N, total nitrogen; NH<sub>4</sub>, ammonium; NO<sub>3</sub>, nitrate; Av. P<sub>2</sub>O<sub>5</sub>, available phosphorus; CEC, cation exchangeable capacity; Ex. Ca and Mg, exchangeable calcium and magnesium.

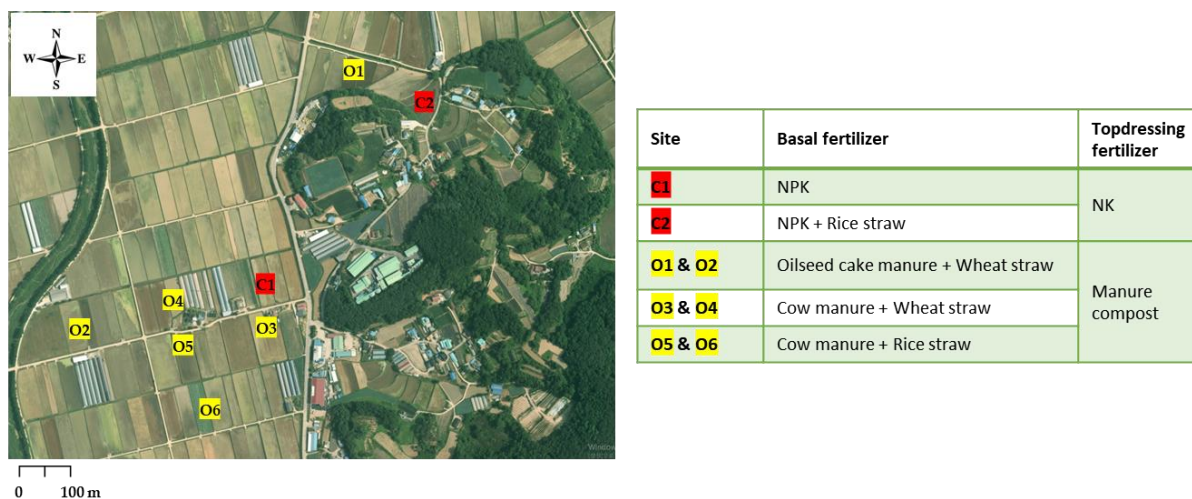

**Figure S1.** Location of rice fields where different fertilizer practices have been carried out.

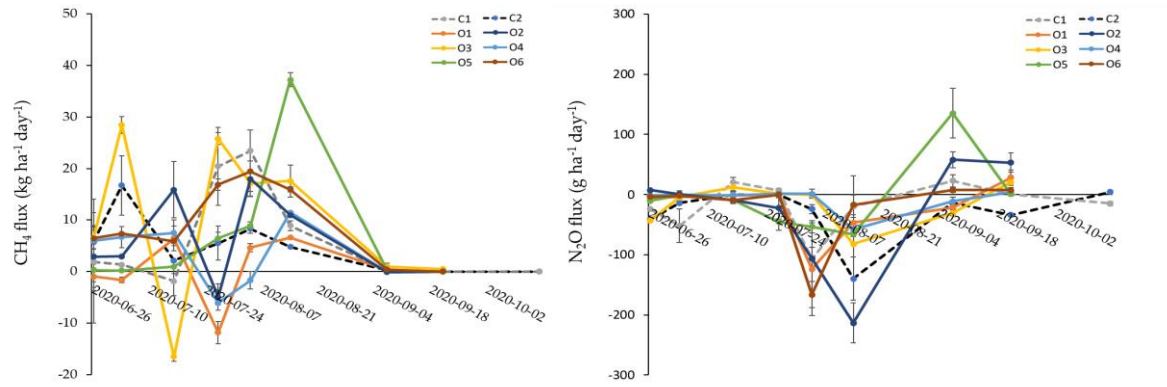

**Figure S2.** The  $\text{CH}_4$  and  $\text{N}_2\text{O}$  flux emissions from paddy soils treated with different long-term fertilizer treatments during the rice growth period: C1 (NPK), C2 (NPK + RS), O1 and O2 (OCM + WS), O3 and O4 (CM + WS), and O5 and O6 (CM + RS). RS, rice straw; OCM, oilseed cake manure; WS, wheat straw; CM, cow manure.
